# Supplementary material
Source: PubMed Central journal article supplement (PMC4249278)
Supplement: IAI.02361-14_zii999090960so1.pdf [file IAI.02361-14_zii999090960so1.pdf]

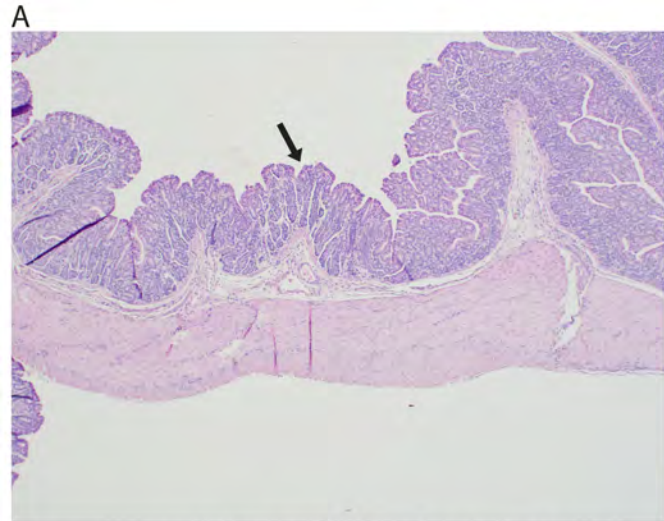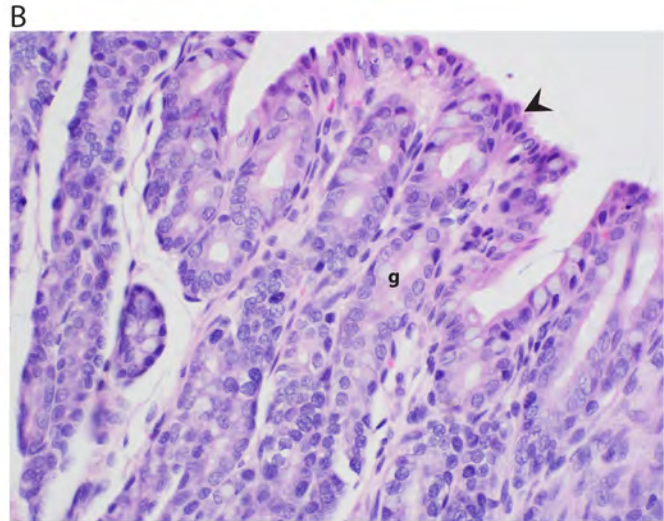

Supplemental Fig. 1. Histopathological analysis of a section of colon from a PBS control rabbit that was not infected. (A) Section of normal colon, magnification 40x. Note thick, intact mucosa layer (arrow). (B) Mucosa layer of normal rabbit colon, magnification 400x. Note the presence of goblet cells (g) and epithelial cells (arrowhead).
